# Supplementary material
Source: publisher site journal article supplement (https://www.spandidos-publications.com/3197/downloadSupplementary)
Supplement: Supplementary file 1 [file downloadSupplementary]

## Sheet: KEGG-upregulation
Table SV. Enrichment of target genes of upregulated microRNAs based on KEGG pathways.
Pathway ID	Pathway description	Observed gene count	False discovery rate	Matching proteins in network (IDs)	Matching proteins in network (labels)
4068	FoxO signaling pathway	4	0.000823	ENSRNOP00000023477,ENSRNOP00000025794,ENSRNOP00000039006,ENSRNOP00000050173	Bcl2l11,Bnip3,Cdkn1b,Sod2
5206	MicroRNAs in cancer	4	0.000823	ENSRNOP00000005746,ENSRNOP00000023965,ENSRNOP00000039006,ENSRNOP00000050173	Bcl2l11,Cdkn1b,Mmp9,Timp3
4066	HIF-1 signaling pathway	3	0.00977	ENSRNOP00000050173,ENSRNOP00000060764,ENSRNOP00000062321	Arnt,Camk2g,Cdkn1b
4152	AMPK signaling pathway	3	0.0119	ENSRNOP00000016221,ENSRNOP00000019652,ENSRNOP00000050057	Cpt1a,Srebf1,Tsc2
5202	Transcriptional misregulation in cancer	3	0.0177	ENSRNOP00000023965,ENSRNOP00000050173,ENSRNOP00000065222	Cdkn1b,Cebpb,Mmp9
5205	Proteoglycans in cancer	3	0.0395	ENSRNOP00000005746,ENSRNOP00000023965,ENSRNOP00000062321	Camk2g,Mmp9,Timp3
All genes targeted by upregulated microRNAs were analyzed by KEGG database(https://www.genome.jp/kegg/pathway.html).
